# Supplementary material for: Sustainable circularly polarized luminescent inks for cryptography
Source: Royal Society of Chemistry journal article supplement (doi:10.1039/d5cc06189j), 2025-12-22
Supplement: d5cc06189j3.pdf [file d5cc06189j3.pdf]

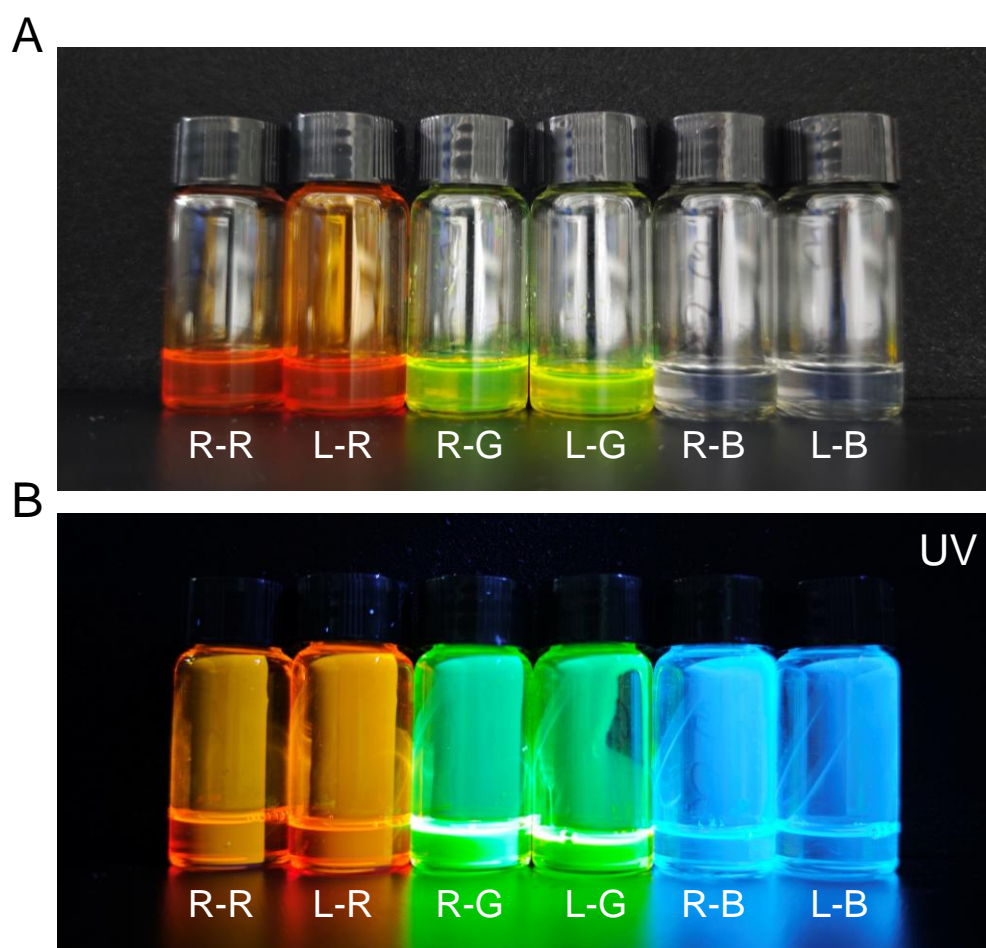

(A and B) Photographs of CPLI with left- and right-handed red emissive, with left- and right-handed green emissive, with left- and right-handed blue emissive under natural light (A) and UV excitation (B), respectively.
