# Supplementary figures and images for: Sustainable circularly polarized luminescent inks for cryptography
Source: Royal Society of Chemistry journal article supplement (doi:10.1039/d5cc06189j), 2025-12-22

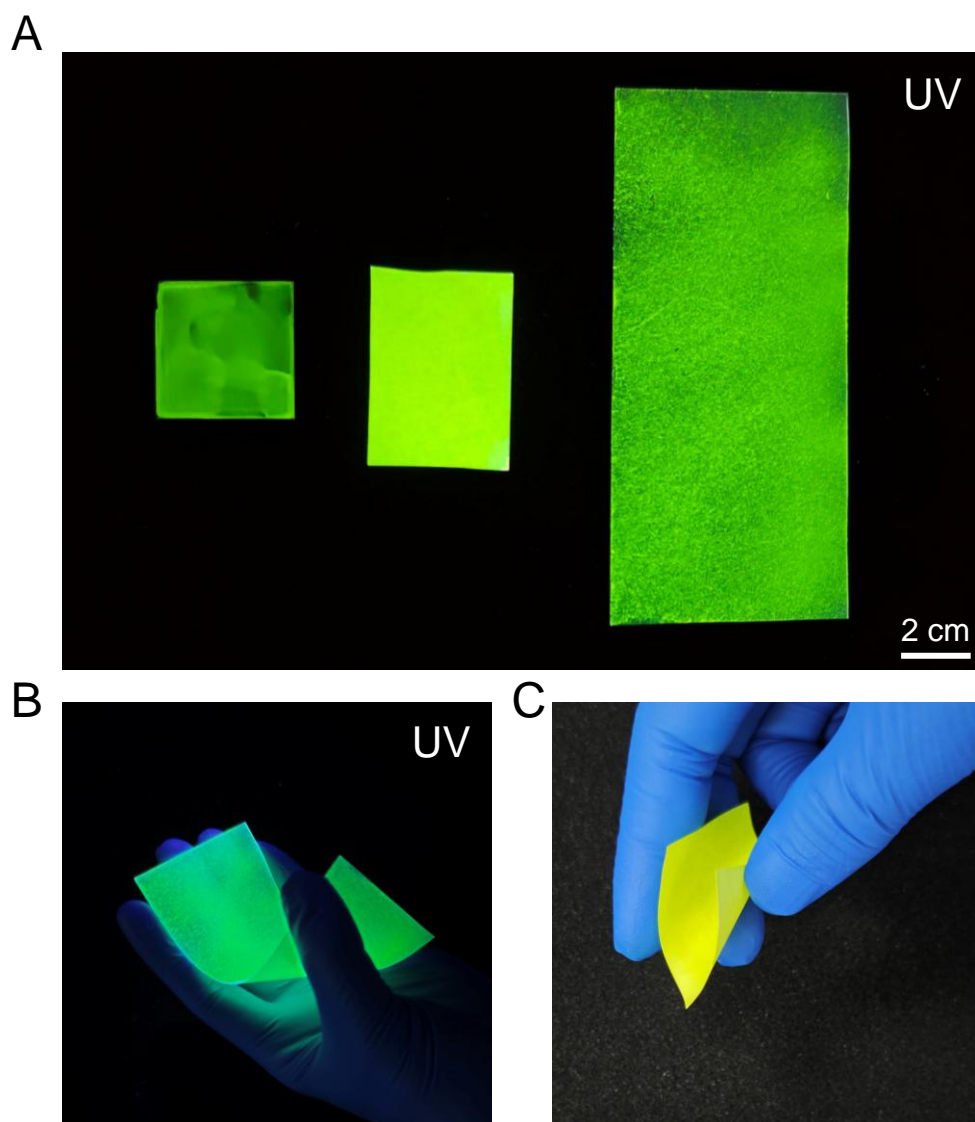

Supplement: d5cc06189j10.pdf [file d5cc06189j10.pdf]

A

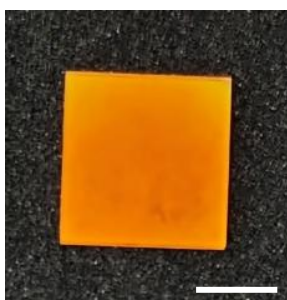

B

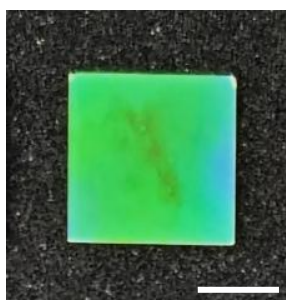

C

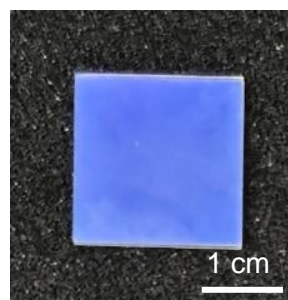

Supplement: d5cc06189j12.pdf [file d5cc06189j12.pdf]

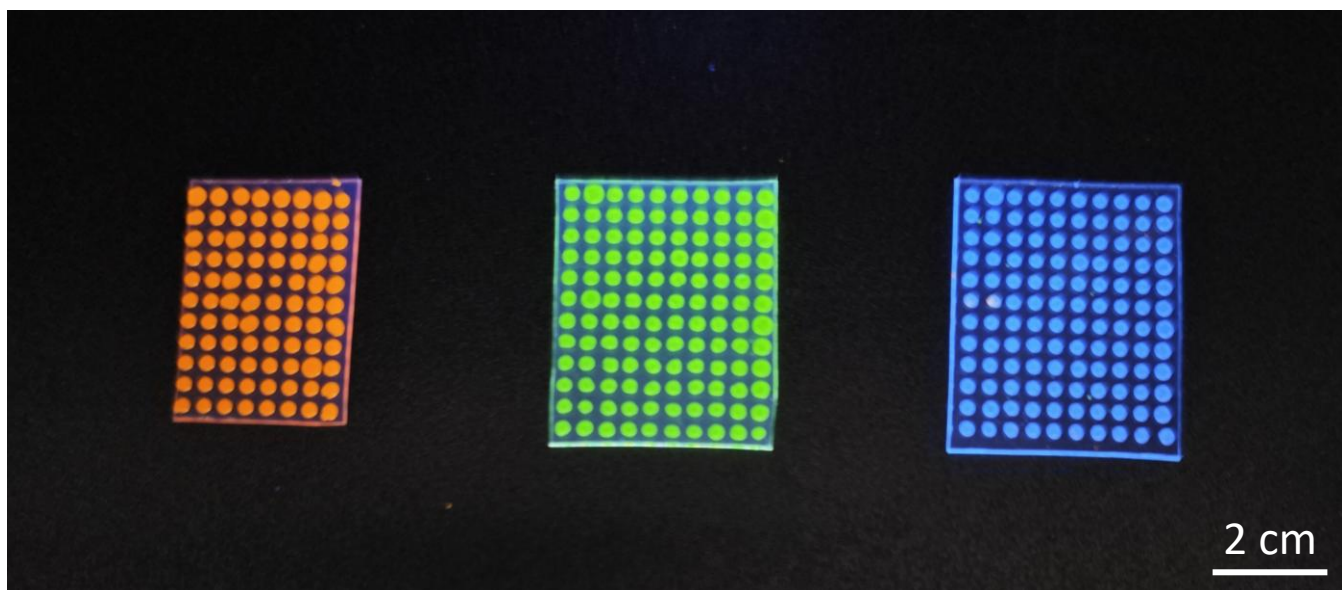

Supplement: d5cc06189j16.pdf [file d5cc06189j16.pdf]

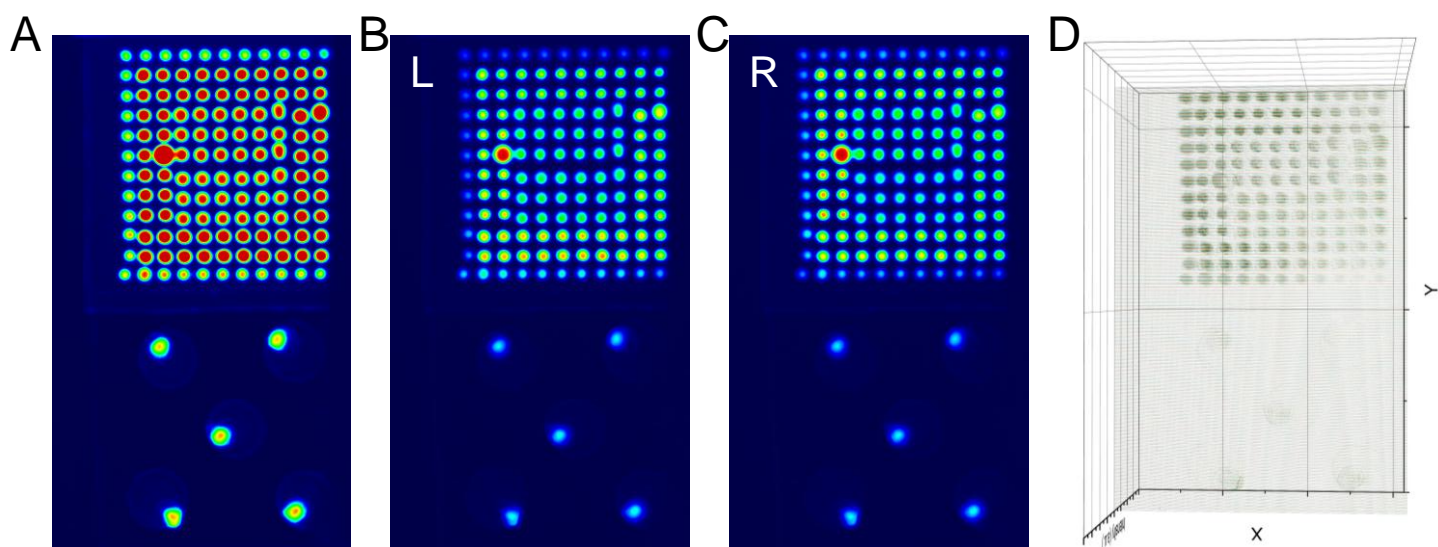

Supplement: d5cc06189j18.pdf [file d5cc06189j18.pdf]

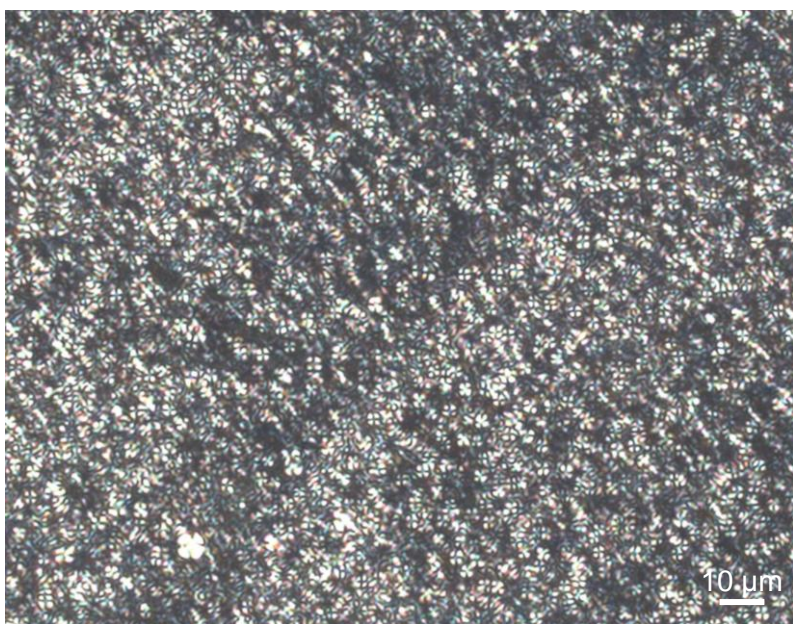

Supplement: d5cc06189j23.pdf [file d5cc06189j23.pdf]

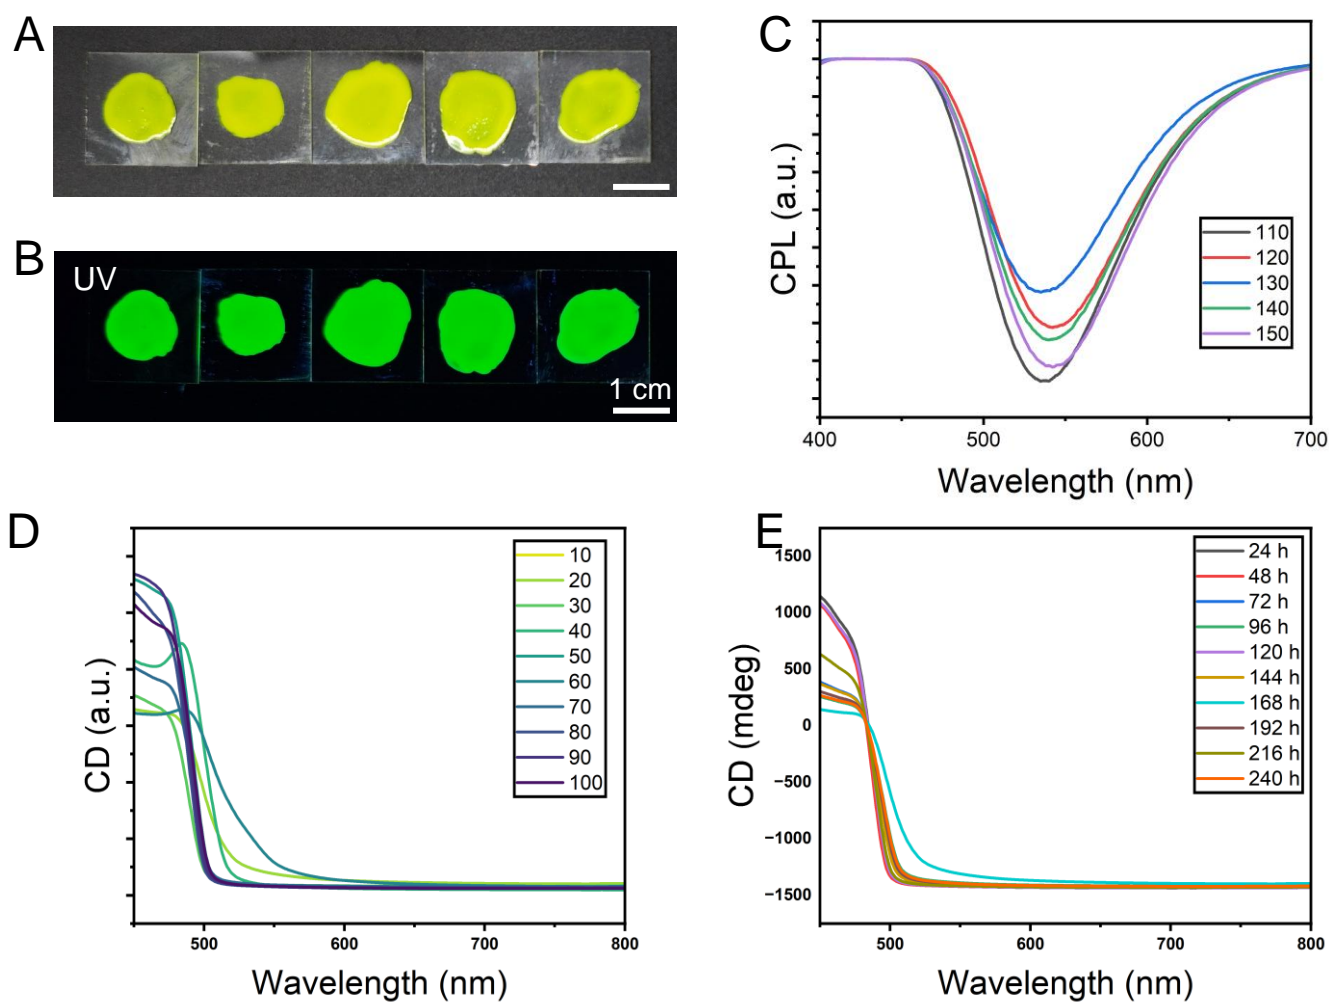

Supplement: d5cc06189j7.pdf [file d5cc06189j7.pdf]
